# Supplementary material
Source: PubMed Central journal article supplement (PMC5765911)
Supplement: supp_CPJ.0000000000000284_Appendix_e-1.pdf [file supp_CPJ.0000000000000284_Appendix_e-1.pdf]

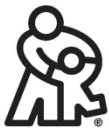

**Division of Neurology**

2401 Gillham Road  
Kansas City, Missouri 64108-4619  
Phone: (816) 234-3090  
Fax: (816) 234-3589

Dear Parent:

The Division of Child Neurology cares deeply about your child's welfare and unique health care needs. With this in mind, we would like you to be aware of a new policy that will be implemented in November, 2015. We will no longer refill medications after office hours, either during the week, or on weekends and holidays. The physicians in our Division will not be permitted to provide refills when they are contacted during these times. All requests for medication refills must be received during regular business office hours, Monday through Friday between 8 AM and 3:30 PM.

The Division of Child Neurology strives to provide the best care possible for your child and we believe that this new policy will benefit your child's health and well-being. Planning ahead to get refills at least a week before you run out of medication is best for your child. This is especially true as we approach the coming winter months and the possibility of illnesses and holiday travel. As we are partners in your child's care, we will do our part by asking about the need for refills at every clinic visit. This will avoid you having to call for last minute refills for medications.

In addition, please understand that the office may need up to 48 hours to complete a request for a refill, recognizing that our physicians and nurse practitioners (advanced practice registered nurses or APRN's) have many other duties in addition to answering refill requests. Every effort will be made to complete requests for medication refills within a 24 hour period, but please be aware this may not be possible every time. Please have your pharmacy contact the clinic about any and all refills needed for medications that we prescribe.

We appreciate your understanding of, and agreement with, this new policy. We will be happy to answer any questions you may have about this new policy or any other questions about your child and the medications prescribed to treat your child's condition.

Sincerely,

The Division of Child Neurology

**Steven M. Shapiro, MD, MSHA**  
Professor of Pediatrics  
Director, Division of Neurology

**Brian Aalbers, DO**  
Clinical Assistant Professor

**Ahmed T. Abdelmoity, MD**  
Associate Professor of Pediatrics  
Chief, Section of Epilepsy  
and Neurophysiology

**Jennifer L. Bickel, MD**  
Associate Professor of Pediatrics  
Co-Director, Comprehensive  
Headache Clinic

**Keith A. Coffman, MD**  
Assistant Professor of Pediatrics  
Clinical Director  
Associate Program Director,  
Child Neurology Residency Program

**Robert P. Cruse, DO**  
Associate Professor of Pediatrics

**Fereydoun Dehkharghani, MD**  
Associate Professor of Pediatrics

**Sergio A. Facchini, MD**  
Associate Professor of Pediatrics

**Ara S. Hall, MD**  
Assistant Professor of Pediatrics

**Arezou Heshmati, MD**  
Assistant Professor of Pediatrics

**Gina L. Jones, DO**  
Assistant Professor of Pediatrics

**Husam R. Kayyali, MD**  
Assistant Professor of Pediatrics

**JB Le Pichon, MD, PhD**  
Associate Professor of Pediatrics  
Director, Child Neurology  
Residency Program

**Kailash Pawar, MD**  
Clinical Assistant Professor of Pediatrics

**Christy Gudenkauf, RN, MSN, MBA**  
Clinic Nurse Manager

**Kathy Vandiver, RN, MSN, MHA, CPN**  
Service Line Director
